# Supplementary material for: Lactobacillus plantarum relieves diarrhea caused by enterotoxin-producing Escherichia coli through inflammation modulation and gut microbiota regulation
Source: Royal Society of Chemistry journal article supplement (doi:10.1039/d0fo02670k), 2020-01-01
Supplement: d0fo02670k1.pdf [file d0fo02670k1.pdf]

Supplementary materials:

Raw material composition of the nutrition of feeds for BALB/c mice:

| Nutrition index | Content(g/kg) | Nutrition index            | Content(g/kg) |
|-----------------|---------------|----------------------------|---------------|
| Crude fiber     | 29            | Crude ash                  | 60            |
| Crude protein   | 201.8         | Total phosphorus           | 7.1           |
| Crude fat       | 42            | Calcium (calculated as Ca) | 11.8          |
| Moisture        | 98            |                            |               |
